# Supplementary material for: Evidence that dysplasia related microRNAs in Barrett’s esophagus target PD-L1 expression and contribute to the development of esophageal adenocarcinoma
Source: publisher site journal article supplement (doi:10.18632/aging.103634), 2020-09-09
Supplement: Supplementary file [file aging-v12i17-103634-supplementary-material-SD1.pdf]

## SUPPLEMENTARY FIGURE

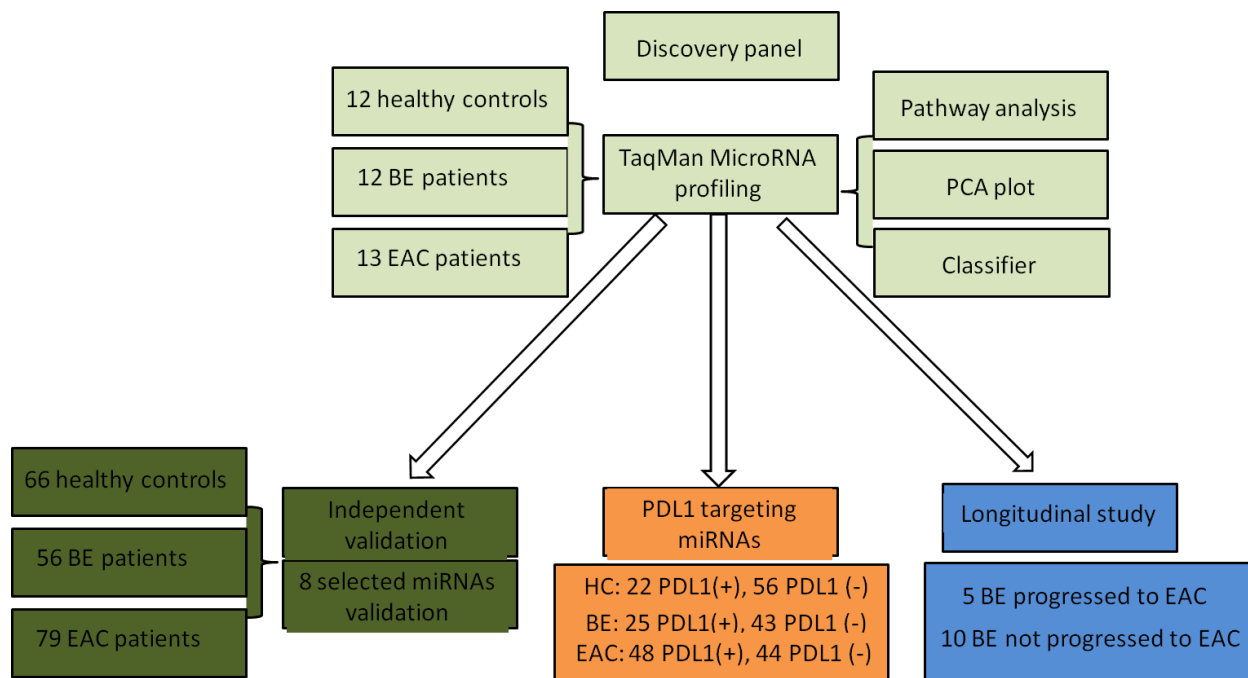

Supplementary Figure 1. The workflow in this study.
