# Supplementary material for: Evidence that dysplasia related microRNAs in Barrett’s esophagus target PD-L1 expression and contribute to the development of esophageal adenocarcinoma
Source: publisher site journal article supplement (doi:10.18632/aging.103634), 2020-09-09
Supplement: Supplementary file [file aging-v12i17-103634-supplementary-material-SD2.pdf]

## SUPPLEMENTARY TABLE

**Supplementary Table 1. Biologic pathways enriched by differentially expressed serum miRNAs.**

| KEGG pathway                                                                          | p-value   | #genes            | #miRNAs |
|---------------------------------------------------------------------------------------|-----------|-------------------|---------|
| Top of Form                                                                           |           | Top of Form       |         |
| Fatty acid biosynthesis (hsa00061) Bottom of Form                                     | 2.238E-12 | 7Bottom of Form   | 6       |
| Top of Form                                                                           |           | Top of Form       |         |
| Hippo signaling pathway (hsa04390) Bottom of Form                                     | 2.604E-06 | 70Bottom of Form  | 15      |
| Top of Form                                                                           |           | Top of Form       |         |
| Axon guidance (hsa04360) Bottom of Form                                               | 2.604E-06 | 69Bottom of Form  | 16      |
| Top of Form                                                                           |           | Top of Form       |         |
| Proteoglycans in cancer (hsa05205)Bottom of Form                                      | 3.331E-05 | 93Bottom of Form  | 18      |
| Top of Form                                                                           |           | Top of Form       |         |
| Glioma (hsa05214) Bottom of Form                                                      | 5.042E-05 | 35Bottom of Form  | 15      |
| Top of Form                                                                           |           | Top of Form       |         |
| Adrenergic signaling in cardiomyocytes(hsa04261) Bottom of Form                       | 9.324E-05 | 69Bottom of Form  | 17      |
| Top of Form                                                                           |           | Top of Form       |         |
| Neurotrophin signaling pathway (hsa04722) Bottom of Form                              | 9.324E-05 | 65Bottom of Form  | 18      |
| Top of Form                                                                           |           | Top of Form       |         |
| ErbB signaling pathway (hsa04012)Bottom of Form                                       | 1.001E-04 | 50Bottom of Form  | 18      |
| Top of Form                                                                           |           | Top of Form       |         |
| Glutamatergic synapse (hsa04724) Bottom of Form                                       | 1.972E-04 | 53Bottom of Form  | 15      |
| Top of Form                                                                           |           | Top of Form       |         |
| Oxytocin signaling pathway (hsa04921)Bottom of Form                                   | 2.029E-04 | 79Bottom of Form  | 16      |
| Top of Form                                                                           |           | Top of Form       |         |
| FoxO signaling pathway (hsa04068) Bottom of Form                                      | 2.363E-04 | 67Bottom of Form  | 16      |
| Top of Form                                                                           |           | Top of Form       |         |
| Long-term potentiation (hsa04720) Bottom of Form                                      | 4.527E-04 | 39Bottom of Form  | 15      |
| Top of Form                                                                           |           | Top of Form       |         |
| cGMP-PKG signaling pathway (hsa04022) Bottom of Form                                  | 5.394E-04 | 79Bottom of Form  | 18      |
| Top of Form                                                                           |           | Top of Form       |         |
| mTOR signaling pathway (hsa04150) Bottom of Form                                      | 7.141E-04 | 35Bottom of Form  | 15      |
| Top of Form                                                                           |           | Top of Form       |         |
| Wnt signaling pathway (hsa04310) Bottom of Form                                       | 7.141E-04 | 66Bottom of Form  | 16      |
| Top of Form                                                                           | 7.141E-04 | Top of Form       | 18      |
| Signaling pathways regulating pluripotency of stem cells (hsa04550)<br>Bottom of Form |           | 67Bottom of Form  |         |
| Top of Form                                                                           |           | Top of Form       |         |
| PI3K-Akt signaling pathway (hsa04151) Bottom of Form                                  | 7.141E-04 | 146Bottom of Form | 19      |
| Top of Form                                                                           |           | Top of Form       |         |
| Acute myeloid leukemia (hsa05221) Bottom of Form                                      | 1.070E-03 | 33Bottom of Form  | 15      |
| Top of Form                                                                           |           | Top of Form       |         |
| Long-term depression (hsa04730) Bottom of Form                                        | 1.318E-03 | 31Bottom of Form  | 11      |
| Top of Form                                                                           |           | Top of Form       |         |
| Ras signaling pathway (hsa04014) Bottom of Form                                       | 1.318E-03 | 100Bottom of Form | 18      |
| Top of Form                                                                           |           | Top of Form       |         |
| Amphetamine addiction (hsa05031)Bottom of Form                                        | 1.354E-03 | 33Bottom of Form  | 16      |
| Top of Form                                                                           |           | Top of Form       |         |
| Prostate cancer (hsa05215) Bottom of Form                                             | 1.373E-03 | 46Bottom of Form  | 15      |

|                                                             |           |                   |    |
|-------------------------------------------------------------|-----------|-------------------|----|
| Top of Form                                                 |           | Top of Form       |    |
| Pathways in cancer (hsa05200) Bottom of Form                | 1.373E-03 | 167Bottom of Form | 18 |
| Top of Form                                                 |           | Top of Form       |    |
| Gap junction (hsa04540) Bottom of Form                      | 1.412E-03 | 39Bottom of Form  | 15 |
| Top of Form                                                 |           | Top of Form       |    |
| Thyroid hormone signaling pathway (hsa04919) Bottom of Form | 1.412E-03 | 53Bottom of Form  | 19 |
| Top of Form                                                 |           | Top of Form       |    |
| Glycosaminoglycan biosynthesis (hsa00534) Bottom of Form    | 1.864E-03 | 11Bottom of Form  | 10 |
| Top of Form                                                 |           | Top of Form       |    |
| Non-small cell lung cancer (hsa05223) Bottom of Form        | 1.864E-03 | 28Bottom of Form  | 15 |
| Top of Form                                                 |           | Top of Form       |    |
| Rap1 signaling pathway (hsa04015) Bottom of Form            | 1.864E-03 | 94Bottom of Form  | 19 |
| Top of Form                                                 |           | Top of Form       |    |
| AMPK signaling pathway (hsa04152) Bottom of Form            | 2.614E-03 | 60Bottom of Form  | 18 |
| Top of Form                                                 |           | Top of Form       |    |
| MAPK signaling pathway (hsa04010) Bottom of Form            | 3.176E-03 | 113Bottom of Form | 19 |
